# Supplementary material for: Evaluating long-range orientational ordering of water around proteins: signature of a tug-of-war scenario
Source: Royal Society of Chemistry journal article supplement (doi:10.1039/d4cp04451g), 2025-01-01
Supplement: d4cp04451g1.pdf [file d4cp04451g1.pdf]

Supporting Information for

## **Evaluating long-range orientational ordering of water around proteins: Signature of a tug-of-war scenario**

Subhabrata Hazra<sup>1</sup>, Biman Jana<sup>1\*</sup>

<sup>1</sup>School of Chemical Science, Indian Association for the Cultivation of Science, Jadavpur, Kolkata 700032, India

\*Corresponding author – Biman Jana

Email: [pcbj@iacs.res.in](mailto:pcbj@iacs.res.in)

Keywords: - Protein-water Interaction, Dipolar Nanodomain, Tug-of-War, Water Orientation, Confined Water, Molecular Recognition

## Contents of the Supporting Information

### ➤ Supporting Results: -

SR1: Ion Distribution in the First Hydration Layer

SR2: Propensity Calculation at Different Protein-Water Distances

SR3: Probability Distribution of the water orientation  $\cos(\theta)$  for three investigated systems in the 2nd hydration shell

SR4: Relationship between total charge, salt effect, and water molecular orientation

SR5: Distance-dependent water orientation around specific surface atom types of Ubiquitin in physiological concentration

SR6: A tug-of-war between the atomic influence of two different groups that are members of the N (+) and the total charge of the protein (+8)

SR7: A tug-of-war between the atomic influence of two different groups that are members of the O (-) and the total charge of the protein (+8)

SR8: Investigation of the atomic influence of O (-) and N (+) groups in proteins with total charges of -8 and +8 both in neutral and physiological salt concentration

### ➤ Supporting Figures - Figures S1 to S7

# Supporting-Results

## SR1. Ion Distribution in the First Hydration Layer

| Charge | Concentration(M) | Total -Ions | 1 <sup>st</sup> Hydration Layer (%) |
|--------|------------------|-------------|-------------------------------------|
| +8     | 0.154            | 634         | 0.09%                               |
| -8     | 0.154            | 634         | 0.17%                               |
| 0      | 0.154            | 626         | 0.05%                               |

## SR2: Propensity Calculation

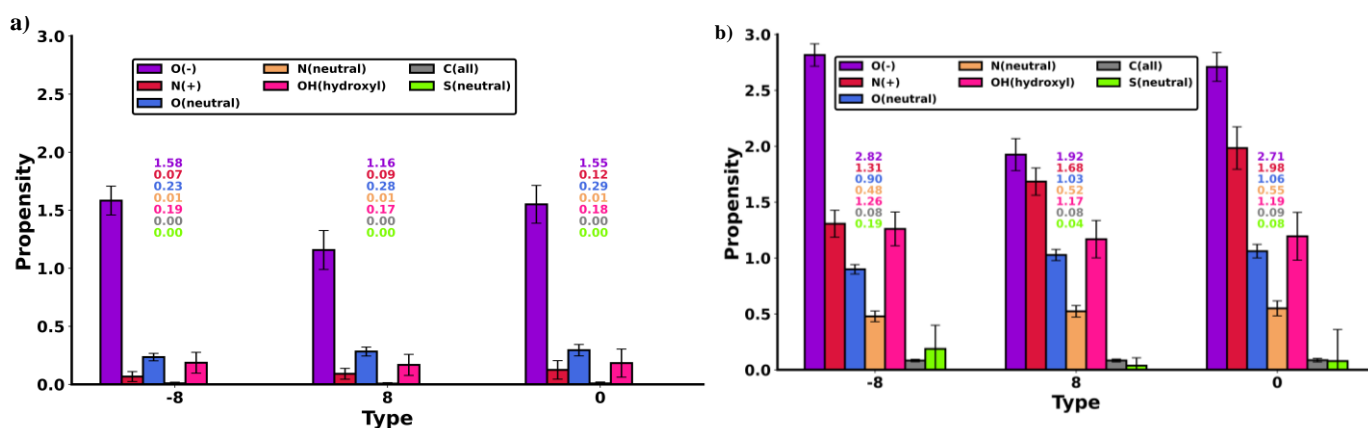

**Figure. S1:**(a) Propensity value of water molecules towards different types of surface amino acid atoms for all the three investigated systems at a protein-water distance of 2.7 Å in neutralizing condition (b) Propensity value of water molecules towards different types of surface amino acid atoms for all the three investigated systems at a protein-water distance of 3.5 Å in neutralizing condition.

## SR3: Probability Distribution of the water orientation $\cos(\theta)$ for three investigated systems in the 2nd hydration shell

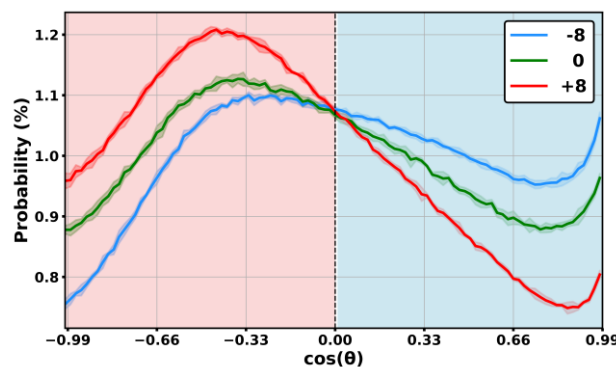

**Figure. S2:** Comparison of the probability distribution of the water orientation  $\cos(\theta)$  for three investigated systems in the 2<sup>nd</sup> hydration shell in neutralising condition, all the error bars stand for the SDs from 5 parallel 20ns simulations.

## SR4: Relationship between total charge, salt effect, and water molecule orientation

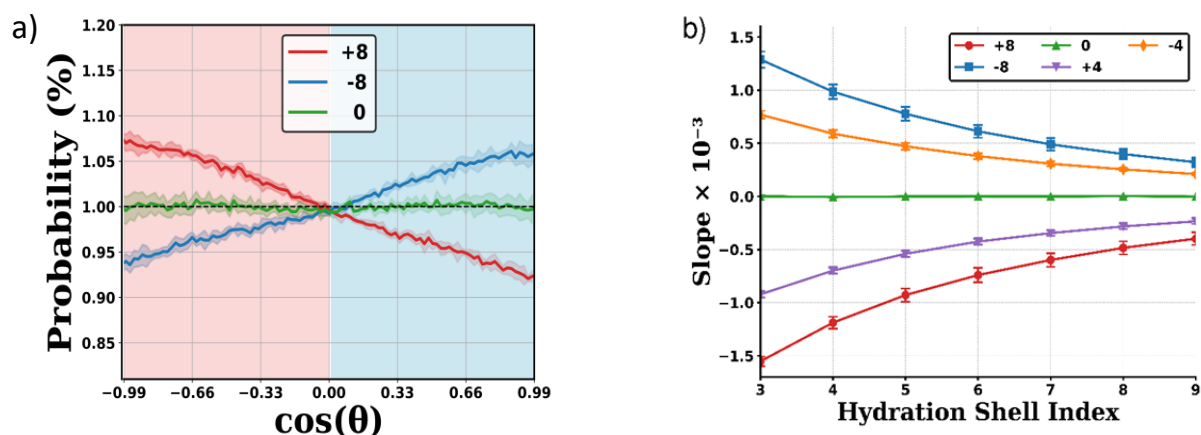

**Figure. S3:** (a) Comparison of the probability distribution of the water orientation  $\cos(\theta)$  for three investigated systems in the 3<sup>rd</sup> hydration shell in physiological salt concentration (b) Charge dependency of Slope (from the Normalized probability distribution of water orientation  $\cos(\theta)$  in each hydration shell up to 9<sup>th</sup> hydration shell) vs Hydration Shell index (i.e. Distance from protein surface) plot in neutralizing condition, all the error bars stand for the SDs from 5 parallel 20ns simulations.

## SR5: Distance-dependent water orientation around specific surface atom types of Ubiquitin in physiological concentration

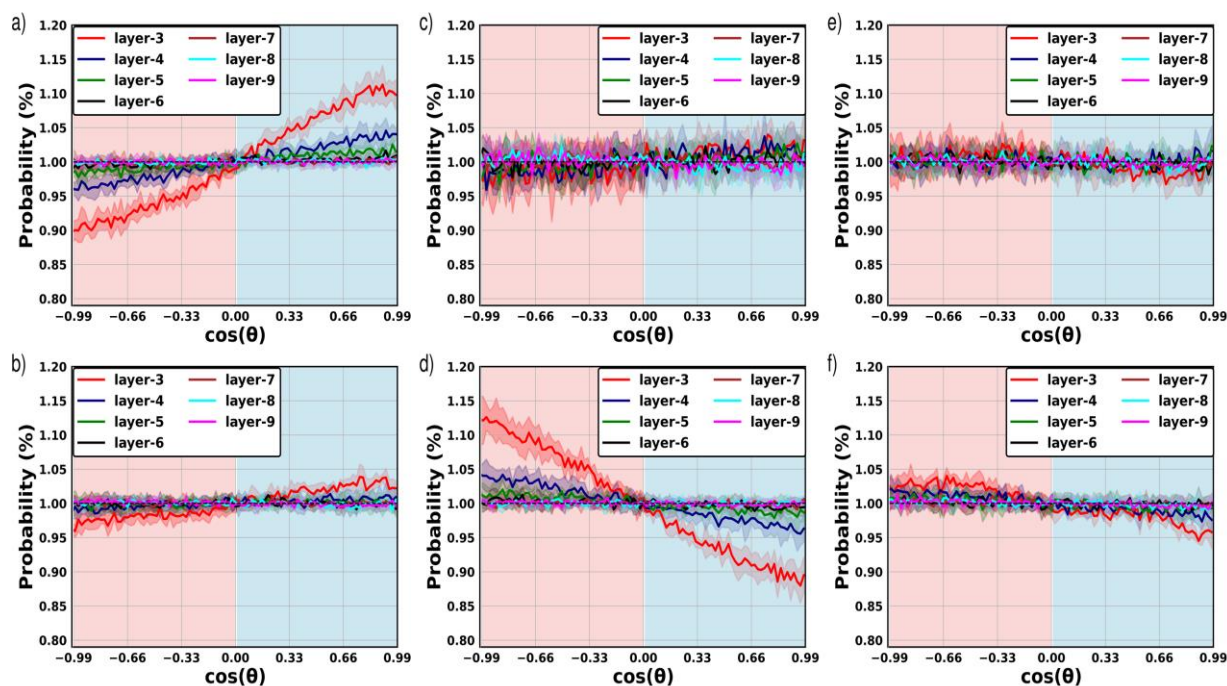

**Figure. S4:** (a) Normalized distribution of the orientational probabilities of these water molecules in the different hydration shells that choose O (-) atom of Ubiquitin as their nearest neighbour (b), (c), (d), (e), (f) representing the same scenario for the water molecules that choose O(neutral), OH (hydroxyl), N(+), N (neutral), C(all) as their nearest neighbour respectively in physiological concentration

## SR6: A tug-of-war between the atomic influence of two different groups that are members of the N (+) and the total charge of the protein (-8)

**Figure. S5** demonstrates the bulk-like behaviour of the water molecules in the 3<sup>rd</sup> and 4<sup>th</sup> hydration shell for Lys and Arg respectively and then overall charges takes control and the overall charge effect fades away with increasing the Hydration shell index. In the presence of salt due to screening of total charge of the protein, atomic influence of Lys and Arg persists up to the 3<sup>rd</sup> and 4<sup>th</sup> hydration shell respectively.

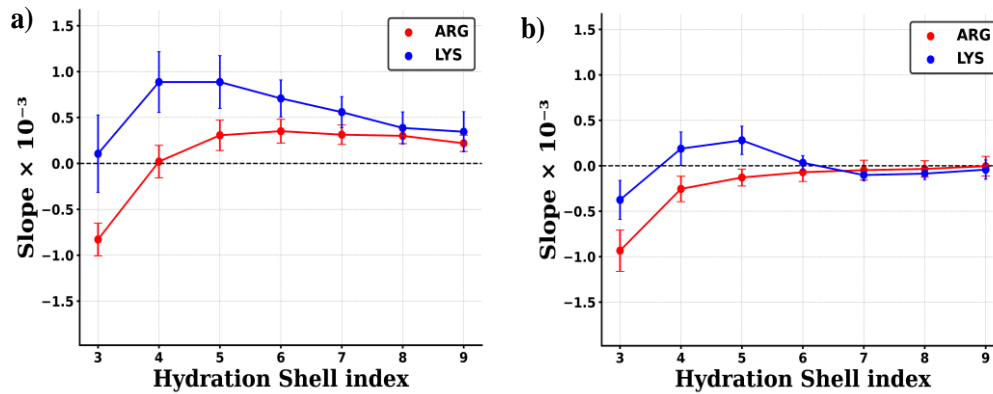

**Figure. S5:** a) Slope (from the Normalized probability distribution of water orientation  $\cos(\theta)$  in each hydration shell up to the 9<sup>th</sup> hydration shell) vs Hydration Shell index (i.e. Distance from protein surface) of these water that choose N (+) of Arg and Lys of a protein with total charge -8 as their nearest neighbours in neutral condition b) Slope (from the Normalized probability distribution of water orientation  $\cos(\theta)$  in each hydration shell up to 9<sup>th</sup> hydration shell) vs Hydration Shell index (i.e. Distance from protein surface) of these water that choose N (+) of Arg and Lys of protein with total charge -8 as their nearest neighbours in physiological salt concentration, all the error bars stand for the SDs from 5 parallel 20ns simulation

## SR7: A tug-of-war between the atomic influence of two different groups that are members of the O (-) and the total charge of the protein (+8)

In the absence of salt both Asp and Glu exhibit similar behaviour (See Figure S6(a)) as we see for the overall O (-) case (Figure 4(d)). Whereas in the presence of salt, Asp shows the shift in the slope value by holding its influence up to 3<sup>rd</sup> hydration shell whereas Glu doesn't (Figure S6(b))

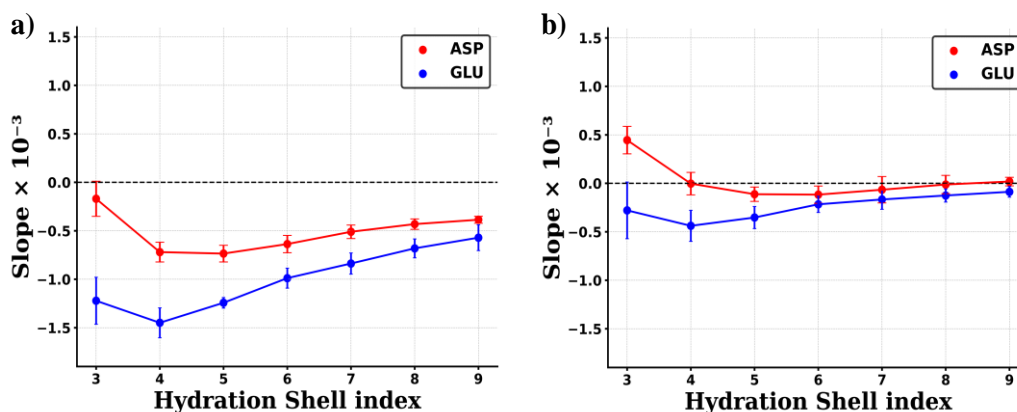

**Figure. S6:** a) Slope (from the Normalized probability distribution of water orientation  $\cos(\theta)$  in each hydration shell up to 9<sup>th</sup> hydration shell) vs Hydration Shell index (i.e. Distance from protein surface) of these water that choose O (-) of Asp and Glu of a protein with total charge +8 as their nearest neighbours in neutral condition b) Slope (from the Normalized probability distribution of water orientation  $\cos(\theta)$  in each hydration shell up to 9<sup>th</sup> hydration shell) vs Hydration Shell index (i.e. Distance from protein surface) of these water that choose O (-) of Asp and Glu of a protein with total charge +8 as their nearest neighbours in physiological salt concentration, all the error bars stand for the SDs from 5 parallel 20ns simulation.

**SR8: Investigation of the atomic influence of O (-) and N (+) groups in proteins with total charges of -8 and +8 both in neutral and physiological salt concentration**

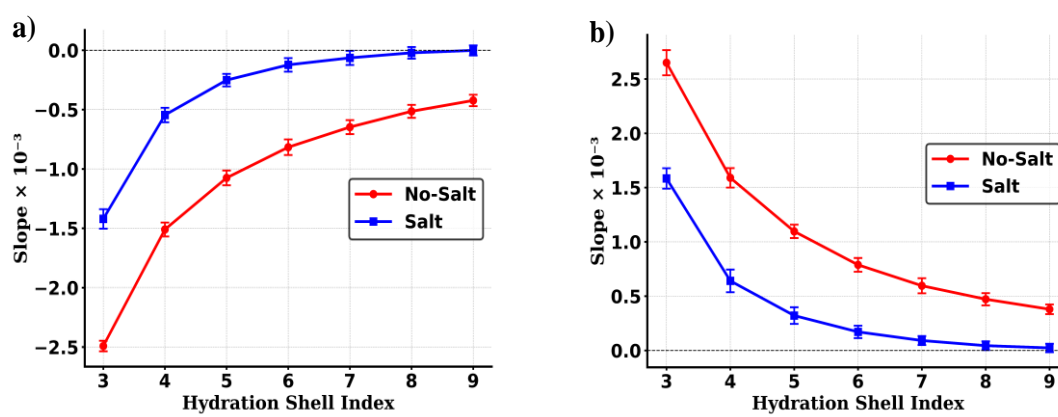

**Fig. S7:** a) Slope (from the Normalized probability distribution of water orientation  $\cos(\theta)$  in each hydration shell up to 9<sup>th</sup> hydration shell) vs Hydration Shell index (i.e. Distance from protein surface) of these water that choose N (+) group of a protein with total charge +8 as their nearest neighbours in neutral condition b) Slope (from the Normalized probability distribution of water orientation  $\cos(\theta)$  in each hydration shell up to 9<sup>th</sup> hydration shell) vs Hydration Shell index (i.e. Distance from protein surface) of these water that choose O (-) of Asp and Glu of protein with total charge +8 as their nearest neighbours in physiological salt concentration, all the error bars stand for the SDs from 5 parallel 20ns simulation.
